# Supplementary material
Source: PubMed Central journal article supplement (PMC5655048)
Supplement: AAC.01272-17_zac011176637s1.pdf [file AAC.01272-17_zac011176637s1.pdf]

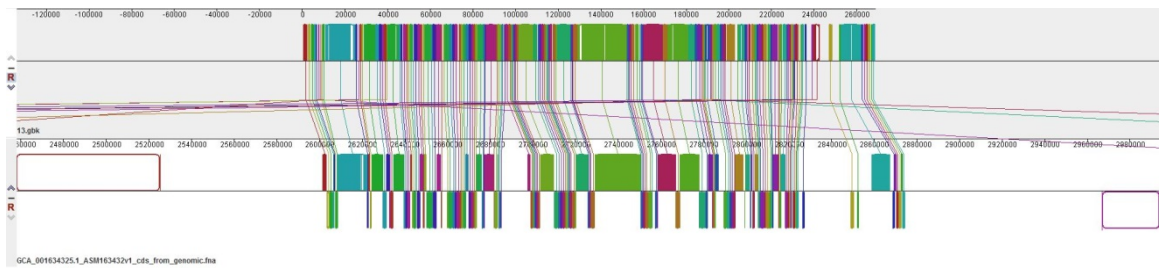

1

2 **Fig. S1** Alignment of contig 13 in *A. veronii* 172 with the complete chromosome of *A.*  
 3 *veronii* (GenBank accession no. CP014774.1). Block outlines with the same color  
 4 represent homologous regions, which are connected by lines. Areas outside the block  
 5 are the regions that do not match. The scale plate above the block indicates the length  
 6 of the contig.
